# Supplementary material for: Computer-Aided Surgery-Navigated, Functional Alignment Total Knee Arthroplasty: A Surgical Technique
Source: PubMed Central journal article supplement — Arthroplast Today. 2022 Mar 11;14:121–7. doi: 10.1016/j.artd.2022.01.029 (PMC8919216; doi:10.1016/j.artd.2022.01.029), 2022-03-11
Supplement: mmc1.pdf [file mmc1.pdf]

# CONFLICT OF INTEREST STATEMENT

## *American Association of Hip and Knee Surgeons*

(Adopted from the American Academy of Orthopaedic Surgeons disclosure statement)

The following form **must be filled out completely and submitted by each author (example, 6 authors, 6 forms).**

Manuscript Title \_\_\_\_\_

1. Royalties from a company or supplier (The following conflicts were disclosed) - None
2. Speakers bureau/paid presentations for a company or supplier (The following conflicts were disclosed) - None
- 3A. Paid employee for a company or supplier (The following conflicts were disclosed) - None
- 3B. Paid consultant for a company or supplier (The following conflicts were disclosed) - None
- 3C. Unpaid consultants for a company or supplier (The following conflicts were disclosed) - None
4. Stock or stock options in a company or supplier (The following conflicts were disclosed) - None
5. Research support from a company or supplier as a Principal Investigator (The following conflicts were disclosed) - None
6. Other financial or material support from a company or supplier (The following conflicts were disclosed) - None
7. Royalties, financial or material support from publishers (The following conflicts were disclosed) - None
8. Medical/Orthopaedic publications editorial/governing board (The following conflicts were disclosed) - None
9. Board member/committee appointments for a society (The following conflicts were disclosed) - None

**Each author must sign AND print or type his/her name, date and submit a separate form**

In addition, one BLINDED Conflict of Interest form (no author names used) should be submitted per manuscript with all author disclosures.

Conor Gouk

Author Name (Print or Type)

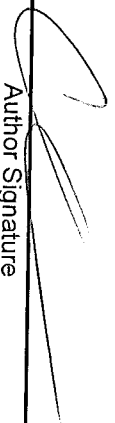

Author Signature

13/12/21

Date
